# Supplementary material for: A Therapeutic Pathway in Patients with Chronic Coronary Syndromes: Proposal for Optimization
Source: MDPI journal article supplement (doi:10.3390/jcm11082091), 2022-04-08
Supplement: s1 [file s1]

## Supplementary Material 3 - Evaluation of appropriateness

### Appropriateness indexes

| Item                                                                                                                                                                         | Median | IQR | IPRAS | Assessment    |
|------------------------------------------------------------------------------------------------------------------------------------------------------------------------------|--------|-----|-------|---------------|
| 15. If you work predominantly in an outpatient setting, how important do you think it is that at discharge you are advised whether or not to continue DAPT beyond 12 months? | 8      | 2   | 6,85  | appropriate   |
| 16. If you work mainly in an outpatient clinic, what elements hinder your choice to continue DAPT beyond 12 months?                                                          |        |     |       |               |
| 16.a. Lack of knowledge about PCI intervention                                                                                                                               | 4      | 6   | 3,10  | uncertain     |
| 16.b. Poor knowledge of the patient's ischemic risk profile                                                                                                                  | 4      | 5   | 3,10  | uncertain     |
| 16.c. Fear of the risk of bleeding                                                                                                                                           | 5      | 4   | 2,35  | uncertain     |
| 16.d. Limited margin of benefit                                                                                                                                              | 3      | 4   | 5,35  | inappropriate |
| 16.e. Other (specify in next question)                                                                                                                                       | 1      | 2   | 7,60  | inappropriate |
| 17. How would you define a patient with CCS?                                                                                                                                 |        |     |       |               |
| 17. a. A patient with suspected CAD and stable angina and/or dyspnea                                                                                                         | 6      | 5   | 2,87  | uncertain     |
| 17.b. Symptomatic patient                                                                                                                                                    | 5      | 6   | 2,35  | uncertain     |
| 17.c. Asymptomatic patient (and/or with stabilized symptomatology)                                                                                                           | 7      | 4   | 4,60  | appropriate   |
| 17.d. Patient who has had an acute event                                                                                                                                     | 6      | 5   | 3,10  | uncertain     |
| 17.e. Patient with elective revascularization for more than one year                                                                                                         | 7      | 4   | 6,10  | appropriate   |
| 17.f. Patient more than 1 year after IM with no further events                                                                                                               | 8      | 3   | 6,10  | appropriate   |
| 17.g. Patient with elective revascularization for less than 1 year                                                                                                           | 6      | 5   | 3,85  | uncertain     |
| 17.h. Patient with microvascular or vasospastic angina                                                                                                                       | 6      | 5   | 3,85  | uncertain     |
| 17.i. Patient with recent episode of heart failure and/or diagnosis of left ventricular dysfunction                                                                          | 3      | 5   | 4,60  | inappropriate |
| 18. Do you consider CCS to be a dynamic disease?                                                                                                                             | 9      | 2   | 7,08  | appropriate   |
| 19. How important is it for a patient with CCS post-MI and multiple risk factors to have the multidisciplinary collaboration of:                                             |        |     |       |               |
| 19.a. Diabetologist                                                                                                                                                          | 8      | 2   | 6,85  | appropriate   |
| 19.b. Nutritionist/Dietitian                                                                                                                                                 | 7      | 3   | 5,35  | appropriate   |

|                                                                                                                                                                                                                                                                                                                                                                       |   |   |      |             |
|-----------------------------------------------------------------------------------------------------------------------------------------------------------------------------------------------------------------------------------------------------------------------------------------------------------------------------------------------------------------------|---|---|------|-------------|
| 19.c. Psychologist                                                                                                                                                                                                                                                                                                                                                    | 6 | 3 | 3,10 | uncertain   |
| 19.d. Physical Therapist                                                                                                                                                                                                                                                                                                                                              | 5 | 3 | 2,35 | uncertain   |
| 19.e. Nephrologist                                                                                                                                                                                                                                                                                                                                                    | 6 | 4 | 3,85 | uncertain   |
| 27. At the 1-year post-MI visit, what element do you most consider to extend DAPT beyond 12 months?                                                                                                                                                                                                                                                                   |   |   |      |             |
| 27.a. That he is already on aspirin and ticagrelor 90 treatment                                                                                                                                                                                                                                                                                                       | 6 | 4 | 4,60 | uncertain   |
| 27.b. That he has this indication from the hospital discharge letter                                                                                                                                                                                                                                                                                                  | 4 | 4 | 3,85 | uncertain   |
| 27.c. That he has a favorable ischemic and hemorrhagic risk profile                                                                                                                                                                                                                                                                                                   | 9 | 1 | 7,60 | appropriate |
| 27.d. That he tolerated DAPT without adverse events in the first year                                                                                                                                                                                                                                                                                                 | 9 | 1 | 7,60 | appropriate |
| 28. The ideal profile of the candidate patient for prolonged DAPT is:                                                                                                                                                                                                                                                                                                 |   |   |      |             |
| 28.a. a patient with CCS post IM, without high hemorrhagic risk, multivessel                                                                                                                                                                                                                                                                                          | 9 | 1 | 7,60 | appropriate |
| 28.b. a patient with post-MI CCS, without high hemorrhagic risk, at high residual ischemic risk by clinical characteristics (diabetes mellitus, chronic renal failure, recurrent acute events, multivessel atherosclerosis)                                                                                                                                           | 9 | 1 | 8,35 | appropriate |
| 28.c. a patient with post-MI CCS, without high hemorrhagic risk, at high residual ischemic risk by procedural characteristics of percutaneous revascularization (common trunk treatment, of three lesions, implantation of three or more stents, bifurcation treatment with two stents, treatment of chronic occlusions or venous grafts, total stent length > 60 mm) | 9 | 1 | 8,35 | appropriate |
| 29. What is the patient profile that would most benefit from a prolonged DAPT strategy?                                                                                                                                                                                                                                                                               |   |   |      |             |
| 29.a. Post-MI patient who has tolerated DAPT for 12 months at high residual ischemic risk regardless of the type of treatment (PCI versus conservative)                                                                                                                                                                                                               | 8 | 2 | 6,85 | appropriate |
| 29.b. Post-MI patient, undergoing PCI, who has tolerated DAPT for 12 months at high clinical and/or procedural residual ischemic risk                                                                                                                                                                                                                                 | 9 | 1 | 7,60 | appropriate |
| 29.c. Post-MI patient, who has tolerated DAPT for 12 months and who has not discontinued it for more than one year, at high residual ischemic risk regardless of the type of treatment (PCI                                                                                                                                                                           | 8 | 2 | 6,85 | appropriate |

|                                                                                                                                                                                            |   |   |      |               |
|--------------------------------------------------------------------------------------------------------------------------------------------------------------------------------------------|---|---|------|---------------|
| versus conservative)                                                                                                                                                                       |   |   |      |               |
| 29.d. Post-MI patient, undergoing PCI, who has tolerated DAPT for 12 months and has not discontinued it for more than one year, at high residual clinical and/or procedural ischemic risk. | 9 | 1 | 7,60 | appropriate   |
| 30. What most hinders the use of prolonged DAPT and/or leads to its discontinuation in the patient with CCS post-MI even though it is potentially useful?                                  |   |   |      |               |
| 30.a. Little time allocated to the visit                                                                                                                                                   | 4 | 4 | 3,85 | uncertain     |
| 30.b. Patient's unwillingness/predisposition to continue such therapy                                                                                                                      | 6 | 3 | 3,33 | uncertain     |
| 30.c. Occurrence of side effects                                                                                                                                                           | 7 | 3 | 5,35 | appropriate   |
| 30.d. Different clinical approaches if the patient is referred to different outpatient clinics/physicians                                                                                  | 7 | 3 | 5,35 | appropriate   |
| 30.e. Negative influence of caregivers                                                                                                                                                     | 4 | 4 | 3,85 | uncertain     |
| 30.f. Poor interaction between specialist and territory (GP)                                                                                                                               | 7 | 3 | 4,60 | appropriate   |
| 30.g. Poor interaction between different specialists (e.g., cardiologist and diabetologist/cardiologist and nephrologist, etc.)                                                            | 6 | 4 | 3,85 | uncertain     |
| 30.h. Early discontinuation of DAPT                                                                                                                                                        | 7 | 3 | 4,60 | appropriate   |
| 31. What do you evaluate most when making a decision to prolong DAPT treatment in a patient with post-IM CCS?                                                                              |   |   |      |               |
| 31.a. Residual ischemic risk profile                                                                                                                                                       | 9 | 1 | 7,60 | appropriate   |
| 31.b. Prevention of new ischemic events                                                                                                                                                    | 8 | 1 | 7,60 | appropriate   |
| 31.c. Number of vascularizations performed by the patient                                                                                                                                  | 8 | 2 | 7,60 | appropriate   |
| 31.d. Fear of bleeding                                                                                                                                                                     | 7 | 3 | 5,35 | appropriate   |
| 31.e. Age of the patient                                                                                                                                                                   | 7 | 3 | 4,60 | appropriate   |
| 31.f. Fragility                                                                                                                                                                            | 8 | 2 | 6,85 | appropriate   |
| 31.g. Comorbidity                                                                                                                                                                          | 8 | 3 | 6,10 | appropriate   |
| 32. What do you refer to for the therapeutic management of a patient with post-IM CCS?                                                                                                     |   |   |      |               |
| 32.a. I follow industry guidelines and consensus documents                                                                                                                                 | 9 | 1 | 7,60 | appropriate   |
| 32.b. I use an existing corporate PDTA                                                                                                                                                     | 3 | 5 | 5,35 | inappropriate |
| 32.c. I use a more empirical approach based on my clinical                                                                                                                                 | 4 | 4 | 4,60 | uncertain     |

|                                                                                                                                  |     |   |      |               |
|----------------------------------------------------------------------------------------------------------------------------------|-----|---|------|---------------|
| experience                                                                                                                       |     |   |      |               |
| 33. What would you like to see available in your facility to improve the possibility of care for patients with CCS?              |     |   |      |               |
| 33.a. Ability to perform remote monitoring                                                                                       | 7   | 3 | 5,35 | appropriate   |
| 33.b. Ability to make such visits on dedicated agendas coordinated by your facility                                              | 8   | 3 | 6,85 | appropriate   |
| 33.c. Possibility to release the report at a later time after the visit, allowing the physician to compare with other colleagues | 5   | 5 | 3,10 | uncertain     |
| 33.d. Presence of a shared Diagnostic-Therapeutic-Assistance Pathway (PDTA)                                                      | 7   | 3 | 4,60 | appropriate   |
| 33.e. Dedicated hospital outpatient department                                                                                   | 7,5 | 3 | 6,10 | appropriate   |
| 33.f. Possibility to follow up the patient with the same team as in the acute phase                                              | 6   | 3 | 4,60 | uncertain     |
| 33.g. Greater availability of budget for such projects and/or recognition for physicians engaged in such activities              | 8   | 3 | 5,35 | appropriate   |
| 33.h. More IT resources for the 360° management of patient care (and/or dialogue with GPs etc.)                                  | 8   | 3 | 6,85 | appropriate   |
| 33.i. Collegial sharing of choices                                                                                               | 7   | 3 | 3,85 | appropriate   |
| 33.j. Integrated management of hospital and territory                                                                            | 8   | 3 | 6,85 | appropriate   |
| 34. How important are "non-technical skills" in your daily work?                                                                 |     |   |      |               |
| 34.a. Use of digital programs/tools                                                                                              | 8   | 3 | 6,10 | appropriate   |
| 34.b. Communication with the patient                                                                                             | 9   | 1 | 7,60 | appropriate   |
| 34.c. Teamwork with colleagues                                                                                                   | 8   | 2 | 6,85 | appropriate   |
| 34.d. Other (specify next)                                                                                                       | 1   | 4 | 6,85 | inappropriate |

Abbreviations: IQR, interquartile range; IPRAS, Interpercentile Range Adjusted for Symmetry.
